# Supplementary material for: Eleven-year Retrospective Study Characterizing Patients With Severe Brain Damage and Poor Neurological Prognosis -Role of Physicians’ Attitude Toward Life-Sustaining Treatment
Source: Research Square preprint supplement (doi:10.21203/rs.3.rs-1113790/v1), 2021-12-14
Supplement: Supplementary file 1 [file 2992d7a26c01a231489e268b.xlsx]

## Sheet: Table 3
	Brainstem reflex [-]	Brainstem reflex [+]	P values
	(n=275)	(n=235)
Withholding treatment [n (%)]	255 (92.7%)	201 (85.5%)	<0.001
Continue catecholamines	178 (69.8%)	82 (40.8%)	<0.001
Continue antibiotics	53 (20.8%)	48 (23.9%)	0.429
Initiate minimal Tx of antibiotics	3 (1.2%)	31 (15.4%)	<0.001
Perform tracheotomy	2 (0.8%)	55 (27.4%)	<0.001
Enteral feeding	8 (3.1%)	68 (33.8%)	<0.001
Perform gastrostomy	0	5 (2.5%)	0.011
Continue hemodialysis	9 (3.5%)	14 (7.0%)	0.096
Withdrawing treatment [n (%)]	8 (2.9%)	11 (4.7%)	0.292
Discontinue catecholamines	0	0
Discontinue antibiotics	0	0
Extubation	0	3 (27.3%)	0.108
Discontinue enteral feeding	1 (12.5%)	3 (27.3%)	0.436
Discontinue hemodialysis	1 (12.5%)	5 (45.5%)	0.127
Organ donation	6 (75.0%)	⸺	<0.001
