# Supplementary material for: Eleven-year Retrospective Study Characterizing Patients With Severe Brain Damage and Poor Neurological Prognosis -Role of Physicians’ Attitude Toward Life-Sustaining Treatment
Source: Research Square preprint supplement (doi:10.21203/rs.3.rs-1113790/v1), 2021-12-14
Supplement: Supplementary file 5 [file 93d9727a84c5a7d9b8c4e73e.xlsx]

## Sheet: Table 1
	Total		Brainstem reflex [-]	Brainstem reflex [+]	p values
N (male/female)	510 (306/204)		275 (151/124)	235 (155/80)	0.011
Age [y/o (IQR)]	69 (55-80)		65 (51–78)	72 (62–82)	<0.001
Etiology, n (%)
Subarachnoid hemorrhage	83 (16.3)		82 (29.8)	1 (0.4)	<0.001
Cerebral hemorrhage	90 (17.6)		90 (32.7)	0 (0)	<0.001
Spontaneous	47 (9.2)		47 (17.1)	0 (0)
Traumatic	43 (8.4)		43 (15.6)	0 (0)
Cerebral infarction	6 (1.2)		6 (2.2)	0 (0)	0.033
Cardiovascular disease	133 (26.1)		26 (9.5)	107 (45.5)	<0.001
Respiratory disease	108 (21.2)		30 (10.9)	78 (33.2)	<0.001
Infectious disease	4 (0.8)		3 (1.1)	1 (0.4)	0.628
Gastrointestinal bleeding	3 (0.6)		0 (0)	3 (1.3)	0.097
Others*	31 (6.1)		19 (6.9)	12 (5.1)
unknown	52 (10.2)		19 (6.9)	33 (14.0)
