# Supplementary material for: Eleven-year Retrospective Study Characterizing Patients With Severe Brain Damage and Poor Neurological Prognosis -Role of Physicians’ Attitude Toward Life-Sustaining Treatment
Source: Research Square preprint supplement (doi:10.21203/rs.3.rs-1113790/v1), 2021-12-14
Supplement: Supplementary file 6 [file 9c1bc1039284a44b92bd8fee.xlsx]

## Sheet: Table 2
	Brainstem	Brainstem	P values
	reflex [-] (n=275)	reflex [+] (n=235)
Prognosis [n, (%)]
Survival to discharge or transfer	2 (0.7%)	75 (31.9%)	<0.001
LOS in hospital after Dx [days (IQR)]	3 (2–7)	16 (6–38)	<0.001
LOS in ICU after Dx [days (IQR)]	2 (1–3, n=234)	2 (1–4, n=148)	0.097
LOS based on treatment policy [days (IQR)]
Aggressive life-sustaining support	7 (4–10.5, n=19)	42 (28.5–60.8, n=36)	<0.001
Transfer Cases	64 (53–75, n=2)	54.5 (41.5–66, n=24)	1
Death Cases	7 (4–9, n=17)	17.5 (10.3–28.3, n=12)	0.005
Withholding life-sustaining support	3 (2–6, n=248)	13 (5–31, n=194)	<0.001
Transfer Cases	―	42 (25–64, n=51)	na
Death Cases	3 (2–6, n=248)	8 (4–16.5, n=143)	<0.001
Willingness of withdrawal	2 (1–3, n=8)	5 (5–7, n=5)	0.181
