# Supplementary material for: Eleven-year Retrospective Study Characterizing Patients With Severe Brain Damage and Poor Neurological Prognosis -Role of Physicians’ Attitude Toward Life-Sustaining Treatment
Source: Research Square preprint supplement (doi:10.21203/rs.3.rs-1113790/v1), 2021-12-14
Supplement: Supplementary file 7 [file fa102e4540e5c69a9c48f457.xlsx]

## Sheet: Table 4
A)
	Brainstem reflex	Brainstem reflex	P values
	[-]（n＝22）	[+]（n=28）
Suggestions of physicians	7	5	0.251
Requests of families	15	23
B)
		Physicians’ suggestion	Families’ request	P values		Brainstem reflex [-]			Brainstem reflex [+]
		(n=12)	(n=38)			Physicians	Families	P values	Physicians	Families	P values
						(n=7)	(n=15)		(n=5)	(n=23)
Transplantation		7	5	0.001		6	5	0.022	1	0	0.029
		(58.3%)	(13.2%)			(85.7%)	(33.3%)		(20.0%)
Cessation of	Mechanical	0	20	0.001		0	7	0.029	0	13	0.022
	Ventilation		(52.6%)				(46.7%)			(56.5%)
	Hemodialysis	3	5	0.329		0	2	0.311	3	3	0.02
		(25.0%)	(13.2%)				(13.3%)		(60.0%)	(13.0%)
	Enteral	2	3	0.377		1	1	0.563	1	2	0.459
	feeding	(16.7%)	(7.9%)			(14.3%)	(6.7%)		(20.0%)	(8.7%)
	Overall	0	5	0.185		0	0	na	0	5	0.25
			(13.2%)							(21.7%)
